# Supplementary material for: Synthesis and Spectroscopic Analyses of New Polycarbonates Based on Bisphenol A-Free Components
Source: MDPI journal article supplement (doi:10.3390/polym13244437), 2021-12-17
Supplement: s1 [file s1]

# Synthesis and Spectroscopic Analyses of New Polycarbonates Based on Bisphenol a-Free Components

Krystyna Wnuczek <sup>1,\*</sup>, Andrzej Puszka <sup>1</sup> and Beata Podkościelna <sup>1</sup>

<sup>1</sup> Department of Polymer Chemistry, Faculty of Chemistry, Institute of Chemical Sciences, Maria Curie-Skłodowska University, Gliniana 33, 20-614, Lublin, Poland

\* krystyna.wnuczek@poczta.umcs.lublin.pl

## S2.3 Synthesis of monomers

### S2.3.1 Synthesis of 1,1'-methanediylbis[1-(chloromethyl)benzene]

225g (1.33 mol) of diphenylmethane, 92g (1.02 mol) of **paraformaldehyde**, 320g (2.24 mol) of anhydrous 98% zinc chloride and 320 cm<sup>3</sup> of pure acetic acid, 140 cm<sup>3</sup> of concentrated 36% hydrochloric acid and 400 cm<sup>3</sup> of cyclohexane were added, and then while stirring, gaseous hydrogen chloride was added at such a rate that the temperature of the mixture increased by 0.5°C for a minute. Under these conditions, the contents of the flask turned transparent after about 2 hours and reached a temperature of about 50°C. The further course of the reaction did not provide enough heat to maintain this temperature, so hydrogen chloride was passed through while heating the contents of the flask in a water bath at 57–62°C. After 3 hours the reaction was completed and after stopping the flow of hydrogen chloride, the flask contents split into two liquid phases, the upper, lighter, main product having the appearance of a greenish oil. After cooling the contents of the flask to room temperature, the layer was easy to filter. After the mass was filtered off, washed with water and compressed, there was obtained a crude product which was washed twice with 5% Na<sub>2</sub>CO<sub>3</sub> solution, 500 cm<sup>3</sup> each, and twice with methanol, 160 cm<sup>3</sup> each. 160g of product was obtained.

### S2.3.2 Synthesis of (methanediyl)dibenzene-4,1-diyl)dimethanethiol (Ditiol)

In a 1000 cm<sup>3</sup> round bottom flask, 122g (0.46 mol) of 1,1'-methanediylbis[4-(chloromethyl)benzene] was dissolved in 450 cm<sup>3</sup> of 1,4-dioxane and after the addition of 71g (0.93 mol) of thiourea at a reflux for 1 hour. The isolated precipitate of the isothiurea salt was filtered off cold. 800 cm<sup>3</sup> of a 12% aqueous NaOH solution was added and refluxed for 1 hour under a water-jacketed reflux condenser. The solution was filtered hot and the cooled filtrate acidified with dilute hydrochloric acid (1:1). A fine crystalline precipitate separated from the solution left at room temperature was filtered off, and then purified by dissolving 10% aqueous NaOH twice in 800 cm<sup>3</sup> and precipitating with the 5% HCl solution. The crude product was purified by crystallization from ethanol (1g per 10 cm<sup>3</sup> of the solvent).

### S2.3.3 Synthesis of 2,2'-[methanediylbis(benzene-4,1-diylmethanediyl)sulfanediyl]diethanol (Diol E)

30g (0.12 mol) of dithiol was dissolved in 500 cm<sup>3</sup> of a 10% aqueous NaOH solution, then the solution was transferred to a 1000 cm<sup>3</sup> three-necked flask equipped with a mechanical stirrer, water jacket reflux condenser and dropping funnel. 20.33g (0.25 mol) of 2-chloroethanol was added via a dropping funnel. As the reaction proceeded, a white precipitate of diol E appeared. The dropping funnel was washed with 10 cm<sup>3</sup> of ethanol. The whole was heated in a boiling water bath for 1.5 h. After cooling, the separated precipitate was filtered off on a funnel and washed with distilled water until becoming neutral. The crude product was purified by recrystallization twice from benzene (120 cm<sup>3</sup>). 26g of diol E was obtained.

**Citation:** Wnuczek, K.; Puszka, A.; Podkościelna, B. Synthesis and Spectroscopic Analyses of New Polycarbonates Based on Bisphenol A-Free Components. *Polymers* **2021**, *13*, 4437. <https://doi.org/10.3390/polym13244437>

Academic Editors: Andrzej Puszka, Beata Podkościelna and Dan Rosu

Received: 19 November 2021

Accepted: 13 December 2021

Published: 17 December 2021

**Publisher's Note:** MDPI stays neutral with regard to jurisdictional claims in published maps and institutional affiliations.

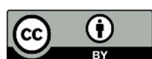

**Copyright:** © 2021 by the authors. Licensee MDPI, Basel, Switzerland. This article is an open access article distributed under the terms and conditions of the Creative Commons Attribution (CC BY) license (<http://creativecommons.org/licenses/by/4.0/>).

### S2.3.4 Synthesis of 6,6'-(methanediyl(benzene-4,1-diylmethanediylsulfanediyl)dihexan-1-ol (Diol H)

30g (0.12 mol) of dithiol was dissolved in 500 cm<sup>3</sup> of a 10% aqueous NaOH solution, then the solution was transferred to a 1000 cm<sup>3</sup> three-necked flask equipped with a mechanical stirrer, water jacket reflux condenser and dropping funnel. Using a dropping funnel, 35.95g (0.25 mol) of 6-chlorohexan-1-ol was added in small portions. As the reaction progressed, a white precipitate of diol H appeared. After the dropwise addition, the funnel was washed with 10 cm<sup>3</sup> of ethanol, and then the contents of the flask were heated in a boiling water bath for 1.5h. After cooling, the contents of the flask with the separated product were filtered on a funnel, washed with distilled water until becoming neutral and dried. The crude product was crystallized from benzene (150 cm<sup>3</sup>) to obtain 50g of diol H.

## S.3 Results and discussion

### S3.2 ATR-FTIR analysis

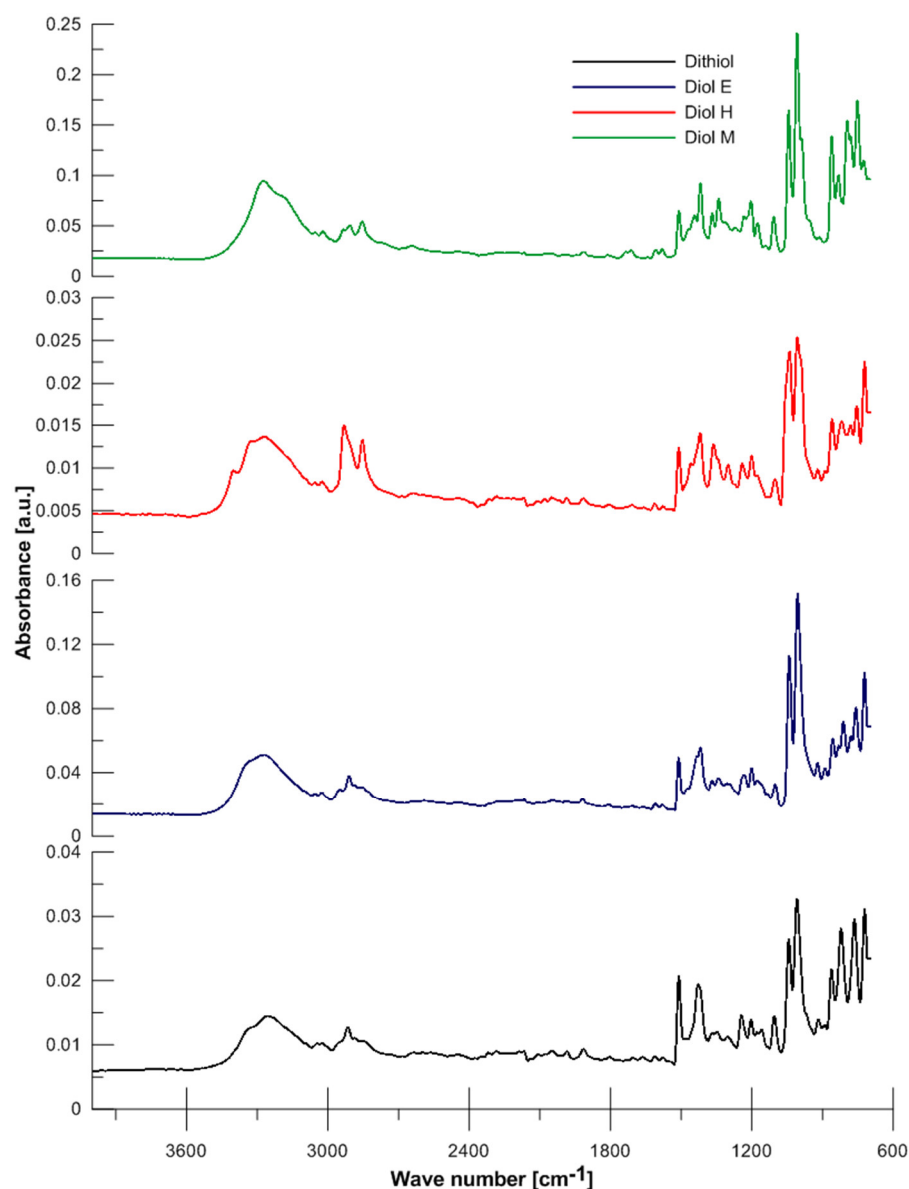

Figure S1. ATR-FTIR analyses of monomers.

**Table S1.** Characteristic signals on ATR-FTIR spectra of monomers [cm<sup>-1</sup>].

| Monomer | -OH  | Ar-H | -CH <sub>2</sub> - | -C-H- | -C-O- | C-C- | R-Ar-R | -S-CH <sub>2</sub> - |
|---------|------|------|--------------------|-------|-------|------|--------|----------------------|
| Dithiol | -    | 3256 | 2915               | 1203  | 1105  | 1243 | 1509   | 1427                 |
|         |      | 3023 | 1368               |       | 1043  |      | 861    | 1008                 |
|         |      | 1914 |                    |       |       |      | 762    | 917                  |
|         |      | 721  |                    |       |       |      |        |                      |
| Diol E  | 3270 | 889  | 721                | 110   | 1039  | 811  | 758    | 920                  |
|         |      | 1510 | 1417               | 1200  | 1234  |      |        | 1005                 |
|         |      | 2910 |                    | 1312  | 1340  |      |        |                      |
| Diol H  | 3269 | 858  | 721                | 1100  | 1041  | 818  | 780    | 1006                 |
|         |      | 1510 | 1419               | 1200  | 1240  |      |        | 2853                 |
|         |      | 2931 |                    | 1300  | 1362  |      |        |                      |
| Diol M  | 3274 | 3021 | 2906               | 2853  | 1043  | 1175 | 795    | -                    |
|         |      | 860  | 725                | 1203  | 1107  |      | 751    |                      |
|         |      |      |                    | 1007  | 1340  |      |        |                      |
|         |      |      |                    |       | 1368  |      |        |                      |
|         |      |      |                    |       | 1417  |      |        |                      |
